# Supplementary material
Source: PubMed Central journal article supplement (PMC4495225)

Figure S1 Growth curves of *Anabaena* 90 during the experiments.

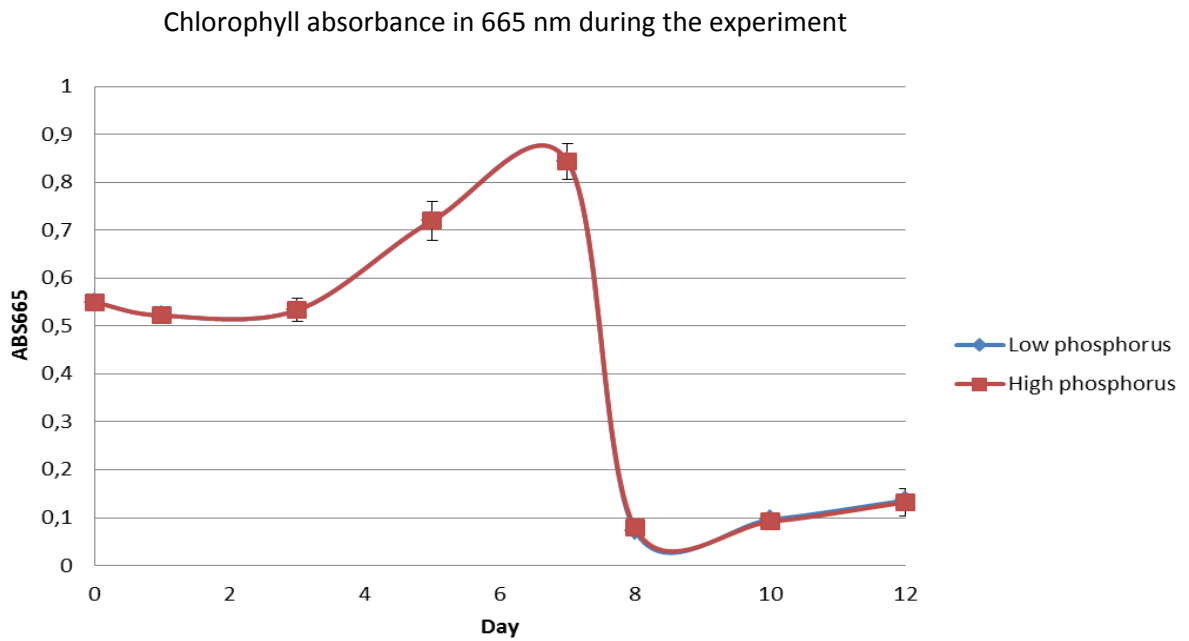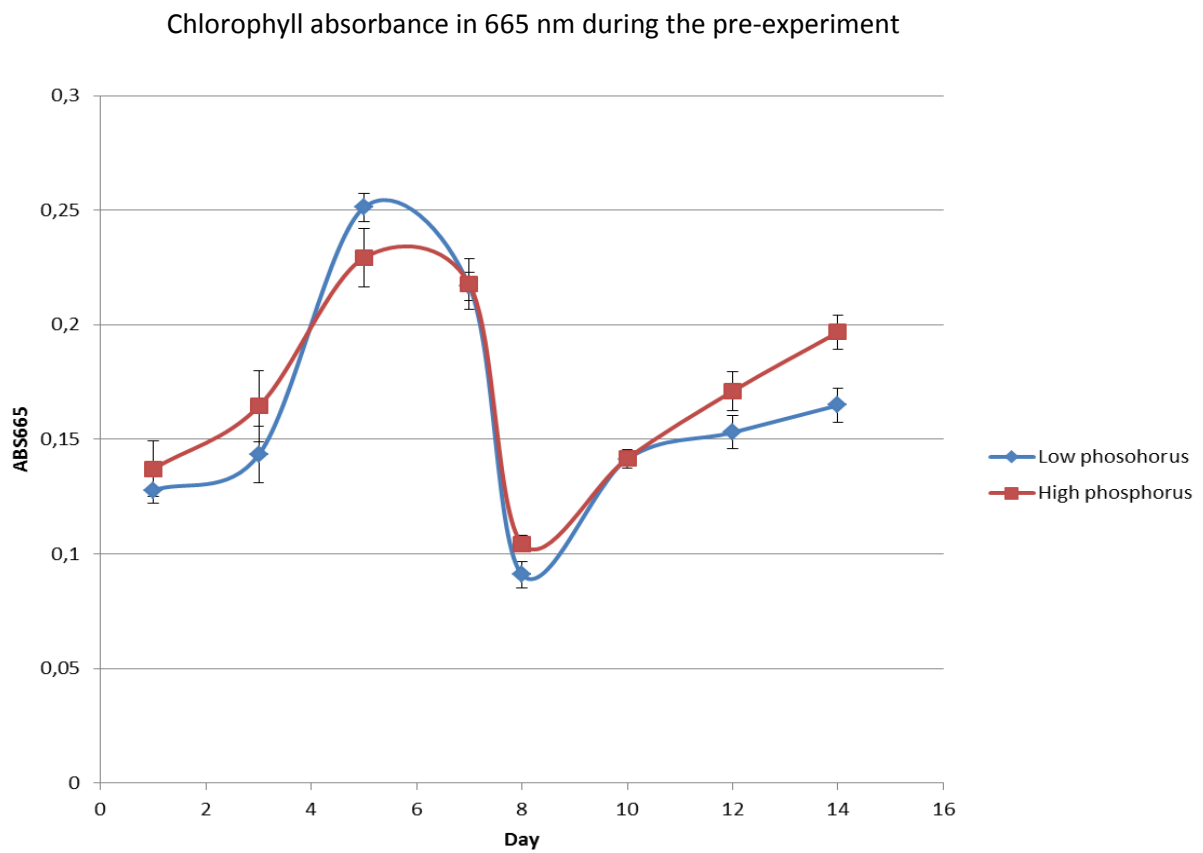

Supplement: AEM.01062-15_zam999116445so1.pdf [file AEM.01062-15_zam999116445so1.pdf]
